# Supplementary material for: Multimorbidity, lifestyle factors, and risk of reduced cognitive performance among older adults: evidence from the longitudinal ageing study in India (LASI)
Source: Research Square preprint supplement (doi:10.21203/rs.3.rs-8366211/v1), 2026-02-04
Supplement: Supplementary file 1 [file 796c012e222de159fe84c73c.docx]

**Supplementary tables**

**Supplementary File 1.** Disease conditions included in multimorbidity in LASI, 2018

| **Disease condition/s** |
| --- |
| Hypertension or high blood pressure |
| Diabetes or high blood sugar |
| Cancer or a malignant tumor |
| Chronic lung disease such as asthma, chronic obstructive pulmonary disease/Chronic bronchitis or other chronic lung problems |
| Chronic heart diseases such as coronary heart disease (heart attack or Myocardial Infarction), congestive heart failure, or other chronic heart problems |
| Stroke |
| Arthritis or rheumatism, Osteoporosis or other bone/joint diseases |
| Any neurological, or psychiatric problems such as depression, Alzheimer’s/Dementia, unipolar/bipolar disorders, convulsions, Parkinson’s etc. |
| High cholesterol |
| Thyroid disorder |
| Asthma |
| Chronic renal failure |
| Gastrointestinal disorder |
| Neurological and psychiatric disorder |
| Skin disease |
| Urinary incontinence |

**Supplementary File 2.** Description and Scale of measurements of explanatory variables

| **Sl. No** | **Variable Level** | **Description and Coding** | **Scale of measurements** |
| --- | --- | --- | --- |
| 1 | Age groups | Agein completed years and it is directedly associated with the life style and cognitive impairment of the persons and groups in four categories 45-50, 51-60, 61-70 and 71 or above years. | Ordinal |
| 2 | Sex | Sex refers to biological differences between males and females, typically categorized based on reproductive anatomy and genetics and also associated with the life style which is in two categories, male and female | Nominal |
| 3 | Living status | Living status of the husband was grouped Living alone, Living with Spouse, living with spouse and children, living with children and other and living with others | Nominal |
| 4 | Education status | Educational status was grouped into No education, Primary, Secondary, and Higher secondary and Above Higher secondary | Ordinal |
| 5 | Economic status of the households | Similarly, household wealth was also calculated from the standard set of assets owned by the household, which included ownership of consumer items and dwelling characteristics. Individuals were ranked on the basis of their household scores and divided into different quintiles, each representing 20 percent of the score, between 1 (poorest) and 5 (wealthiest). | Ordinal |
| 6 | Social group | For each household surveyed, the social group to which the head of the household belonged to was recorded irrespective of the actual social group to which the individual members belonged. The information recorded in this regard was based entirely on the response of the informant and not based on any state or central level list of the social group and it’s grouped in four categories as a ST, SC, OBC and Non-SC/ST/OBC for the present study. | Nominal |
| 7 | Religion | Religious affiliation is another’s a contextual factor which have bearing on life styles of the patient’s religious brief/stigma and grouped into Hindu, Muslim and Others. | Nominal |
| 8 | Place of residence | This variable is derived from the question sector of the residence. It is dichotomous variables (Rural and urban) according the where the patients were living at the time of the survey. | Nominal |
| 9 | Region of residence | To examine the regional variation of outcomes, India was divided into six regions based on geographical location and cultural settings and categorized as North, Central, East, West, South and North-east regions. | Nominal |

**Supplementary File 3**. Prevalence of chronic conditions or diseases by Socioeconomic characteristics

| **Socioeconomic characteristics** | **Diseases specific (Yes %)** | | | | | | | | | | | | | | | |
| --- | --- | --- | --- | --- | --- | --- | --- | --- | --- | --- | --- | --- | --- | --- | --- | --- |
| Hypertension or high blood pressure | Diabetes or high blood sugar | Cancer or a malignant tumor | Chronic lung disease such as asthma, chronic lung problems | Chronic heart diseases chronic heart problems | Stroke | Arthritis or rheumatism, Osteoporosis or other bone/joint diseases | Any neurological, or psychiatric problems such as depression, Alzheimer’s/Dementia, unipolar/ | High cholesterol | Thyroid disorder | Asthma | Chronic renal failure | Gastrointestinal disorder | Neurological and psychiatric disorder | Skin disease | Urinary incontinence |
| ***%*** | ***%*** | ***%*** | ***%*** | ***%*** | ***%*** | ***%*** | ***%*** | ***%*** | ***%*** | ***%*** | ***%*** | ***%*** | ***%*** | ***%*** | ***%*** |
| **Age** |  |  |  |  |  |  |  |  |  |  |  |  |  |  |  |  |
| 45-50 | 18.5 | 7.5 | 0.5 | 3.3 | 2.1 | 0.8 | 10.7 | 2.3 | 1.7 | 3.4 | 67.9 | 0.4 | 16.3 | 2.3 | 4.5 | 1.7 |
| 51-60 | 25.9 | 12.6 | 0.6 | 6.1 | 2.7 | 1.5 | 14.9 | 2.0 | 2.4 | 3.2 | 75.1 | 0.5 | 17.7 | 2.0 | 5.7 | 2.1 |
| 61-70 | 31.9 | 15.1 | 0.6 | 7.5 | 4.9 | 2.6 | 19.1 | 2.4 | 2.8 | 2.4 | 72.3 | 1.0 | 19.1 | 2.4 | 5.0 | 3.2 |
| 71 or above | 35.7 | 14.0 | 0.9 | 11.0 | 6.4 | 3.3 | 21.8 | 3.6 | 2.1 | 2.1 | 70.4 | 0.6 | 19.5 | 3.6 | 5.8 | 6.0 |
| **Sex** |  |  |  |  |  |  |  |  |  |  |  |  |  |  |  |  |
| Male | 23.4 | 12.5 | 0.5 | 7.3 | 4.2 | 2.5 | 12.9 | 2.5 | 2.3 | 1.2 | 72.8 | 0.8 | 18.4 | 2.5 | 5.9 | 3.0 |
| Female | 31.0 | 12.2 | 0.8 | 6.2 | 3.5 | 1.4 | 19.1 | 2.5 | 2.3 | 4.2 | 71.3 | 0.5 | 17.8 | 2.5 | 4.7 | 2.9 |
| **Living Status** |  |  |  |  |  |  |  |  |  |  |  |  |  |  |  |  |
| Living alone | 31.7 | 11.6 | 0.2 | 7.3 | 2.6 | 1.8 | 21.9 | 3.0 | 1.7 | 2.1 | 82.4 | 0.4 | 16.5 | 3.0 | 5.2 | 2.7 |
| Living with Spouse | 27.2 | 14.3 | 0.6 | 8.0 | 4.3 | 1.8 | 18.3 | 2.5 | 2.3 | 2.5 | 79.3 | 0.9 | 17.4 | 2.5 | 5.2 | 3.1 |
| Living with spouse and children | 25.0 | 11.9 | 0.6 | 5.7 | 3.6 | 1.9 | 14.0 | 2.2 | 2.4 | 3.0 | 70.5 | 0.7 | 18.8 | 2.2 | 5.7 | 2.6 |
| Living with children and other | 34.6 | 13.0 | 0.9 | 8.3 | 4.6 | 2.2 | 20.3 | 2.7 | 2.1 | 2.8 | 65.9 | 0.5 | 17.7 | 2.7 | 4.4 | 4.1 |
| Living with others | 26.1 | 9.1 | 0.9 | 6.7 | 2.4 | 2.2 | 14.8 | 3.5 | 2.2 | 2.3 | 79.9 | 0.3 | 14.8 | 3.5 | 4.1 | 3.3 |
| **Education status** |  |  |  |  |  |  |  |  |  |  |  |  |  |  |  |  |
| No education | 24.4 | 8.1 | 0.5 | 6.5 | 2.8 | 1.8 | 16.6 | 2.4 | 1.0 | 1.8 | 76.7 | 0.5 | 0.5 | 2.4 | 4.7 | 3.0 |
| Primary | 28.5 | 13.1 | 0.9 | 7.7 | 4.3 | 2.1 | 17.3 | 2.6 | 2.6 | 2.7 | 72.8 | 0.9 | 0.9 | 2.6 | 6.3 | 4.0 |
| Secondary | 29.3 | 15.3 | 0.7 | 6.7 | 4.2 | 2.4 | 15.2 | 2.7 | 3.3 | 4.2 | 73.4 | 0.8 | 0.8 | 2.7 | 6.8 | 3.1 |
| Higher secondary | 32.9 | 19.5 | 0.6 | 6.3 | 6.2 | 2.2 | 16.0 | 2.1 | 4.0 | 3.6 | 50.6 | 0.7 | 0.7 | 2.1 | 5.3 | 2.5 |
| Graduate & above | 34.0 | 22.2 | 0.7 | 5.8 | 4.3 | 1.2 | 13.1 | 2.7 | 5.8 | 7.0 | 81.9 | 0.8 | 0.8 | 2.7 | 4.3 | 1.6 |
| **Wealth quintile** |  |  |  |  |  |  |  |  |  |  |  |  |  |  |  |  |
| Poorest | 21.0 | 8.4 | 0.4 | 5.5 | 2.6 | 1.5 | 13.2 | 2.0 | 1.2 | 1.3 | 79.4 | 0.7 | 0.7 | 2.0 | 4.3 | 2.7 |
| Poorer | 24.6 | 9.1 | 0.5 | 6.2 | 3.0 | 1.8 | 16.0 | 2.4 | 1.8 | 2.2 | 75.3 | 0.4 | 0.4 | 2.4 | 5.2 | 2.8 |
| Middle | 26.7 | 11.1 | 0.5 | 6.5 | 3.5 | 2.2 | 15.7 | 2.4 | 1.9 | 2.3 | 70.5 | 0.6 | 0.6 | 2.4 | 5.2 | 3.4 |
| Richer | 30.8 | 14.7 | 0.9 | 6.5 | 3.7 | 2.0 | 17.8 | 2.8 | 2.4 | 4.0 | 71.1 | 0.8 | 0.8 | 2.8 | 5.4 | 3.1 |
| Richest | 36.0 | 19.6 | 1.0 | 9.1 | 6.6 | 2.4 | 19.2 | 2.7 | 4.4 | 4.7 | 66.2 | 0.8 | 0.8 | 2.7 | 6.3 | 3.1 |
| **Caste** |  |  |  |  |  |  |  |  |  |  |  |  |  |  |  |  |
| Scheduled tribe | 15.4 | 5.1 | 0.4 | 4.7 | 1.2 | 1.2 | 10.0 | 1.6 | 0.7 | 1.4 | 81.2 | 0.5 | 0.5 | 1.6 | 4.6 | 2.4 |
| Scheduled caste | 24.5 | 8.8 | 0.6 | 7.0 | 3.3 | 2.1 | 15.9 | 2.7 | 1.4 | 1.9 | 75.2 | 0.7 | 0.7 | 2.7 | 4.9 | 3.2 |
| Other backward castes | 27.9 | 14.0 | 0.5 | 7.2 | 3.9 | 1.7 | 17.1 | 2.5 | 2.2 | 2.5 | 70.4 | 0.6 | 0.6 | 2.5 | 5.1 | 2.2 |
| Others Caste | 32.5 | 14.3 | 1.1 | 6.2 | 4.8 | 2.2 | 16.6 | 2.4 | 3.5 | 4.4 | 70.5 | 0.8 | 0.8 | 2.4 | 6.0 | 3.8 |
| **Religion** |  |  |  |  |  |  |  |  |  |  |  |  |  |  |  |  |
| Hindu | 26.2 | 11.7 | 0.6 | 6.7 | 3.6 | 1.9 | 16.3 | 2.4 | 2.0 | 2.6 | 73.3 | 0.6 | 0.6 | 2.4 | 5.0 | 2.8 |
| Muslim | 34.8 | 16.4 | 0.7 | 7.0 | 5.1 | 2.3 | 17.7 | 2.4 | 2.9 | 3.9 | 68.2 | 0.8 | 0.8 | 2.4 | 7.1 | 4.5 |
| Other | 31.5 | 13.6 | 0.9 | 6.1 | 4.4 | 2.4 | 13.8 | 2.9 | 5.2 | 3.3 | 61.8 | 0.8 | 0.8 | 2.9 | 5.7 | 2.0 |
| **Place of residence** |  |  |  |  |  |  |  |  |  |  |  |  |  |  |  |  |
| Rural | 22.7 | 8.2 | 0.6 | 6.5 | 3.0 | 1.8 | 15.8 | 2.4 | 1.3 | 1.7 | 73.3 | 0.6 | 0.6 | 2.4 | 5.2 | 3.2 |
| Urban | 38.0 | 21.5 | 0.9 | 7.0 | 5.7 | 2.2 | 17.3 | 2.6 | 4.5 | 5.3 | 69.4 | 0.8 | 0.8 | 2.6 | 5.3 | 2.6 |
| **Region** |  |  |  |  |  |  |  |  |  |  |  |  |  |  |  |  |
| North | 38.1 | 12.3 | 0.8 | 6.4 | 4.9 | 1.8 | 14.0 | 1.9 | 5.4 | 4.2 | 56.8 | 0.5 | 25.4 | 1.9 | 7.0 | 2.9 |
| Central | 32.1 | 20.9 | 0.6 | 7.9 | 4.6 | 1.7 | 20.9 | 3.6 | 3.6 | 3.7 | 63.9 | 0.6 | 10.9 | 3.6 | 4.1 | 1.5 |
| East | 25.7 | 9.0 | 0.7 | 6.2 | 4.2 | 2.3 | 18.6 | 3.1 | 1.6 | 2.9 | 78.0 | 0.6 | 26.7 | 3.1 | 6.6 | 5.5 |
| Northeast | 27.9 | 12.3 | 0.9 | 7.0 | 4.2 | 2.3 | 18.1 | 1.5 | 1.9 | 2.2 | 83.6 | 0.9 | 14.2 | 1.5 | 5.1 | 2.7 |
| West | 19.7 | 7.1 | 0.4 | 6.0 | 1.9 | 1.5 | 9.0 | 1.7 | 1.0 | 1.9 | 69.1 | 0.6 | 17.1 | 1.7 | 4.4 | 2.3 |
| South | 29.6 | 7.7 | 0.5 | 3.3 | 2.6 | 1.6 | 5.8 | 1.9 | 1.0 | 2.0 | 77.4 | 0.8 | 23.3 | 1.9 | 5.5 | 2.4 |
| **Total** | **27.5** | **12.3** | **0.6** | **6.7** | **3.8** | **1.9** | **16.3** | **2.5** | **2.3** | **2.8** | **72.1** | **0.7** | **18.1** | **2.5** | **5.2** | **3.0** |

**Supplementary File 4.** Cognitive performance by Socioeconomic characteristics

| **Socioeconomic characteristics** | **Cognitive performance % of older adults in the lowest 10th percentile of scores** | | | | | | | |
| --- | --- | --- | --- | --- | --- | --- | --- | --- |
| ***Total word recall*** | | ***Orientation score*** | | ***Arithmetic function*** | | ***Executive function*** | |
| ***Mean*** | ***%*** | ***Mean*** | ***%*** | ***Mean*** | ***%*** | ***Mean*** | ***%*** |
| **Age** |  |  |  |  |  |  |  |  |
| 45-50 | 9.8 | 6.7 | 7.1 | 12.5 | 5.3 | 11.9 | 2.6 | 13.9 |
| 51-60 | 9.2 | 8.1 | 6.9 | 17.2 | 4.8 | 15.8 | 2.4 | 17.4 |
| 61-70 | 8.5 | 12.4 | 6.7 | 21.9 | 4.5 | 19.8 | 2.3 | 20.8 |
| 71 or above | 7.3 | 23.3 | 6.2 | 32.6 | 3.7 | 31.3 | 2.0 | 30.9 |
| **Sex** |  |  |  |  |  |  |  |  |
| Male | 9.2 | 9.7 | 7.2 | 11.2 | 5.9 | 8.6 | 2.6 | 15.1 |
| Female | 8.6 | 12.7 | 6.4 | 27.4 | 3.6 | 27.0 | 2.2 | 23.7 |
| **Living Status** |  |  |  |  |  |  |  |  |
| Living alone | 8.0 | 19.6 | 6.3 | 32.4 | 3.7 | 27.3 | 2.1 | 28.7 |
| Living with Spouse | 8.8 | 10.8 | 6.8 | 19.0 | 4.6 | 18.2 | 2.3 | 19.9 |
| Living with spouse and children | 9.3 | 8.2 | 7.0 | 14.8 | 5.2 | 13.8 | 2.5 | 16.2 |
| Living with children and other | 7.9 | 17.3 | 6.2 | 31.4 | 3.5 | 29.2 | 2.1 | 26.5 |
| Living with others | 7.6 | 22.6 | 6.4 | 30.5 | 4.1 | 27.7 | 2.2 | 27.4 |
| **Education status** |  |  |  |  |  |  |  |  |
| No education | 7.9 | 16.4 | 6.1 | 34.0 | 2.8 | 33.5 | 2.0 | 28.4 |
| Primary | 8.7 | 10.3 | 7.1 | 12.0 | 5.3 | 7.7 | 2.4 | 16.4 |
| Secondary | 9.6 | 5.9 | 7.6 | 3.6 | 6.5 | 1.6 | 2.7 | 12.1 |
| Higher secondary | 10.4 | 4.1 | 7.8 | 1.5 | 7.4 | 0.5 | 3.0 | 6.4 |
| Graduate & above | 12.0 | 1.8 | 7.9 | 0.8 | 7.9 | 0.5 | 3.2 | 4.7 |
| **Wealth quintile** |  |  |  |  |  |  |  |  |
| Poorest | 8.4 | 13.7 | 6.6 | 23.6 | 3.9 | 25.5 | 2.2 | 24.5 |
| Poorer | 8.5 | 12.2 | 6.6 | 22.4 | 4.3 | 21.2 | 2.3 | 21.5 |
| Middle | 8.8 | 11.3 | 6.8 | 19.4 | 4.7 | 17.1 | 2.4 | 18.8 |
| Richer | 9.0 | 10.7 | 6.9 | 18.2 | 5.0 | 15.2 | 2.5 | 16.3 |
| Richest | 9.6 | 8.5 | 7.0 | 15.3 | 5.4 | 12.6 | 2.5 | 16.8 |
| **Caste** |  |  |  |  |  |  |  |  |
| Scheduled tribe | 7.9 | 19.7 | 6.2 | 33.5 | 3.2 | 34.0 | 2.1 | 26.5 |
| Scheduled caste | 8.4 | 12.8 | 6.5 | 23.8 | 4.0 | 22.7 | 2.2 | 23.5 |
| Other backward castes | 9.0 | 10.6 | 6.8 | 18.8 | 4.8 | 17.2 | 2.4 | 18.5 |
| Others Caste | 9.3 | 8.6 | 7.1 | 14.2 | 5.4 | 12.0 | 2.5 | 16.6 |
| **Religion** |  |  |  |  |  |  |  |  |
| Hindu | 8.9 | 11.1 | 6.8 | 19.8 | 4.7 | 18.1 | 2.4 | 19.6 |
| Muslim | 8.8 | 10.1 | 6.7 | 20.3 | 4.5 | 20.7 | 2.3 | 19.7 |
| Other | 8.2 | 15.9 | 6.8 | 21.6 | 4.7 | 20.1 | 2.3 | 21.3 |
| **Place of residence** |  |  |  |  |  |  |  |  |
| Rural | 8.5 | 13.1 | 6.6 | 24.1 | 4.2 | 22.1 | 2.3 | 22.3 |
| Urban | 9.7 | 7.7 | 7.3 | 10.8 | 5.7 | 10.8 | 2.6 | 14.1 |
| **Region** |  |  |  |  |  |  |  |  |
| North | 8.8 | 8.8 | 7.0 | 15.8 | 4.9 | 17.8 | 2.4 | 21.1 |
| Central | 9.5 | 8.9 | 6.7 | 25.7 | 5.1 | 14.0 | 2.4 | 18.4 |
| East | 8.5 | 13.2 | 6.8 | 16.0 | 4.5 | 20.4 | 2.2 | 23.7 |
| Northeast | 8.4 | 13.9 | 6.7 | 21.5 | 4.5 | 18.1 | 2.4 | 18.5 |
| West | 9.0 | 10.1 | 6.8 | 17.7 | 4.3 | 22.4 | 2.4 | 17.8 |
| South | 9.2 | 10.6 | 6.8 | 19.5 | 4.7 | 20.6 | 2.5 | 17.1 |
| **Total** | **8.9** | **11.4** | **6.8** | **20.0** | **4.6** | **18.6** | **2.4** | **19.7** |
